# 1 Complex patterns of sex-biased demography in canines

2 Tanya N. Phung<sup>1</sup>, Robert K. Wayne<sup>2</sup>, Melissa A. Wilson Sayres<sup>3,5\*</sup>, Kirk E. Lohmueller<sup>1,2,4,5\*</sup>

## 3 **Affiliations:**

4 <sup>1</sup>Interdepartmental Program in Bioinformatics, University of California, Los Angeles, CA 90095, USA.

5 <sup>2</sup>Department of Ecology and Evolutionary Biology, University of California, Los Angeles, CA 90095,  
6 USA.

7 <sup>3</sup>School of Life Sciences and Center for Evolution and Medicine, The Biodesign Institute, Arizona State  
8 University, Tempe, AZ 85281

9 <sup>4</sup>Department of Human Genetics, David Geffen School of Medicine, University of California, Los  
10 Angeles, CA 90095, USA.

11 <sup>5</sup>These authors contributed equally to this work.

12

## 13 **\*To whom correspondence should be addressed:**

14 Melissa A. Wilson Sayres

15 School of Life Sciences

16 Arizona State University

17 427 E Tyler Mall

18 Tempe, AZ, 85281

19 (480) 727-6366

20 melissa.wilsonsayres@asu.edu

21

22 Kirk E. Lohmueller

23 Department of Ecology and Evolutionary Biology

24 University of California, Los Angeles

25 621 Charles E. Young Drive South

26 Los Angeles, CA 90095-1606

27 (310)-825-7636

28 klohmueeller@ucla.edu

29

## 30 **INTRODUCTION**

31 Studies of genetic variation have shown that the demographic history of dogs has been extremely  
32 complex, involving multiple bottleneck and admixture events. However, existing studies have not  
33 explored the variance in the number of reproducing males and females, and whether it has changed across  
34 evolutionary time. While male-biased mating practices, such as male-biased migration and multiple  
35 paternity, have been observed in wolves, recent breeding practices could have led to female-biased mating  
36 patterns in breed dogs. In addition, breed dogs are thought to have experienced the popular sire effect,  
37 where a small number of males father many offspring with a large number of females. Here we use  
38 genetic variation data to test how widespread sex-biased mating practices in canines are during different  
39 time points throughout their evolutionary history. Using whole genome sequence data from 33 dogs and  
40 wolves, we show that patterns of diversity on the X chromosome and autosomes are consistent with a  
41 higher number of reproducing males than females over ancient evolutionary history in both dogs and  
42 wolves, suggesting that mating practices did not change during early dog domestication. In contrast, since  
43 breed formation, we found evidence for a larger number of reproducing females than males in breed dogs,  
44 consistent with the popular sire effect. Our results confirm that the demographic history of canines has  
45 been complex, with unique and opposite sex-biased processes occurring at different times. The signatures  
46 observed in the genetic data are consistent with documented sex-biased mating practices in both the wild  
47 and domesticated populations, suggesting that these mating practices are pervasive.

48

49 Dogs were the first animals known to be domesticated and have lived alongside humans and shared our  
50 environment ever since<sup>1</sup>. There is tremendous interest in understanding their genetics and evolutionary  
51 history<sup>2-5</sup>. Many studies have shown that dogs have a complex evolutionary history; they experienced a  
52 population size reduction (i.e. bottleneck) associated with domestication and additional breed-specific

53 bottlenecks associated with breed formation during the Victorian era<sup>6</sup>. In addition to bottleneck events,  
54 dogs experienced admixture with wolves during the domestication process<sup>7</sup>. Studies have disagreed about  
55 the process of domestication, including when, where, and how many times dogs were domesticated<sup>2,8–12</sup>.  
56 However, despite the extensive work on understanding dog demographic history, existing studies have  
57 not explored the population history of males and females across dog domestication. Departures from an  
58 equal number of reproducing males and females are called sex-biased demographic processes, and leave  
59 signatures in the genome (reviewed in Wilson Sayres 2018<sup>13</sup>). Previous ecological and field studies  
60 suggested that mating practices have been sex-biased in canines. In the wild populations, vonHoldt et al.  
61 (2008) observed that in some cases, Yellowstone male wolves would migrate to an existing wolf pack to  
62 mate with the alpha female when the alpha male dies<sup>14</sup>. The migration into an existing wolf pack is  
63 therefore male-biased. An additional source of male biased migration may come from male wolves called  
64 “Casanova wolves”. These wolves leave their natal packs and visit a nearby wolf pack around mating  
65 season to mate with the subordinate females<sup>15</sup>. Lastly, there has also been evidence of multiple paternity  
66 in Ethiopian wolves and foxes<sup>16,17</sup>. In the domesticated populations, it is thought that more females  
67 contributed to breed formation than males, indicating female-biased processes<sup>18</sup>. In addition, recent  
68 reproductive practices, such as the popular sire effect, which involves a small number of males  
69 reproducing with a large number of females can lead to female-biased demography<sup>19</sup>. Despite these  
70 observations of mating practices suggesting the numbers of reproducing males and females has been  
71 unequal during canid evolution, it is unclear how pervasive these processes are, and which have had the  
72 dominant effect on shaping patterns of diversity.

73  
74 To test how widespread sex biased demography has been throughout canid evolution, we calculated and  
75 compared measures of genetic diversity on the X chromosome to those on the autosomes. This ratio has  
76 been termed  $Q$  in Emery et al. (2010) and we will use this notation throughout<sup>20</sup>. In male-heterogametic  
77 sex-determining systems (XX/XY) with equal numbers of reproducing males and females, there are three  
78 copies of the X chromosome for every four copies of the autosomal genome. Therefore, in a constant size

79 population without any natural selection or sex-biased processes,  $Q$  is expected to be 0.75 (reviewed in  
80 Webster and Wilson Sayres 2016<sup>21</sup>). Specifically,  $Q = N_X/N_A \cong 0.75$ . Deviations from this expected  
81 ratio could be indicative of sex-biased processes. If  $Q < 0.75$ , there are fewer copies of the X  
82 chromosome than expected, suggesting a larger number of reproducing males than reproducing females,  
83 indicative of male-biased processes. If  $Q > 0.75$ , there are more copies of the X chromosome than  
84 expected, suggesting a larger number of reproducing females than reproducing males, indicative of  
85 female-biased processes.

86

87 Studies comparing measures of genetic diversity between the X chromosome and autosomes have  
88 resulted in many insights into the evolutionary history of humans. Hammer et al. (2008) computed  $Q$  by  
89 fitting a model of demographic history to the ratio in the mean of genetic diversity within the X  
90 chromosome and autosomes:  $Q_\pi = \pi_X/\pi_A$ <sup>22</sup>. They found that  $Q_\pi$  is greater than 0.75 in all human  
91 populations examined, suggesting female-biased processes that have led to more reproducing females  
92 than males during human evolutionary history<sup>22</sup>. Later, Keinan et al. (2009)<sup>23</sup> computed  $Q$  by calculating  
93 the ratio in fixation index,  $F_{ST}$ , between the X chromosome and the autosomes:  $Q_{FST} = \frac{\ln(1-2F_{ST}^A)}{\ln(1-2F_{ST}^X)}$ . They  
94 found that  $Q_{FST}$  is less than 0.75 only when comparing a non-African population to an African  
95 population<sup>23</sup>. This result suggests that there was a male-biased migration out of Africa, where there were  
96 more reproducing males than females. Even though these two studies came to different conclusions  
97 regarding the sex ratio in human history, a later study reconciled these seemingly disparate findings by  
98 demonstrating that  $Q$  can detect bias in sex ratios at different timescales, depending on whether it is  
99 calculated from genetic diversity ( $Q_\pi$ ) or the fixation index ( $Q_{FST}$ )<sup>20</sup>. Specifically,  $Q_\pi$  can detect sex bias  
100 in ancient timescales, which is before or immediately after the split between populations, whereas  $Q_{FST}$   
101 detects sex-biased demography on recent timescales, after the populations split from each other<sup>20</sup>. Emery  
102 et al. (2010) reconciled results from Hammer et al. (2008) and Keinan et al. (2009) by showing that  
103 evolutionary processes within human history are consistent with an earlier female bias followed by a male

104 bias during the migration of some humans out of Africa<sup>20</sup>. Additionally, direct comparisons of the two  
105 studies were complicated by linked selection on the X chromosome<sup>24,25</sup>. In addition to humans, comparing  
106 the genetic diversity between the X chromosome and autosomes has also been used to study sex-biased  
107 processes in many other species<sup>13</sup>.

108

109 Given how examining patterns of genetic diversity on the X chromosome and the autosomes has  
110 facilitated our understanding of sex-biased demography in other species and what has been observed  
111 regarding sex-biased mating practices in canines, we wanted to test how widespread these mating  
112 practices are throughout different time points during canine evolutionary history. We utilized whole-  
113 genome sequences of 21 dogs and 12 wolves. Using the estimator of the effective sex ratio based on  
114 nucleotide diversity, we found that  $Q_{\pi}$  is less than 0.75 in both dogs and wolves, indicative of an ancient  
115 male bias either in the shared ancestral population, or immediately after their split. We then inferred the  
116 effective sex ratio in a population genetic model, demonstrating that a population size reduction by itself  
117 cannot generate the empirical patterns. Rather, a male-biased sex ratio was needed in conjunction with a  
118 population size reduction to recapitulate empirical patterns. Finally, using the estimator of the effective  
119 sex ratio based on the fixation index, we showed that while the demographic history in wolves has  
120 remained male-biased in recent history, the demographic history in dogs has changed from male-biased in  
121 the ancient timescale to female-biased in recent times. These results add to our current understanding  
122 about the canine demographic history and suggest the need to incorporate sex-biased demography in  
123 future studies.

124

## 125 **RESULTS**

### 126 **Description of the data**

127 We collected a dataset of 33 female canid whole genomes that include 4 German Shepherds, 5 Tibetan  
128 Mastiffs, 12 dog individuals from a variety of breeds, 6 Arctic Wolves, and 6 Grey Wolves  
129 (Supplementary Table 1). The German Shepherd and Tibetan Mastiff data were sequenced by Gou et al.

130 (2014)<sup>26</sup> and the *fastq* files were downloaded from NCBI SRA. We combined 12 high coverage (>15X)  
131 whole genome sequences of female dogs from multiple breeds that were included in Marsden et al.  
132 (2016)<sup>27</sup> because we were interested in how results differ between using a group of one breed versus using  
133 a group consisting of multiple breeds. We named this pooled group the “Pooled Breed Dogs”. The Arctic  
134 Wolf data were sequenced by Robinson et al (Submitted). These Arctic Wolves were located in Northern  
135 Canada (north of the Arctic circle). The longitudinal and latitudinal locations for these Arctic Wolves are  
136 included in Supplementary Table 1. We also used high coverage (>15X) whole genome sequences of  
137 female Grey Wolves from Marsden et al. (2016)<sup>27</sup>. Since these Grey Wolves originated from Europe,  
138 Asia, and Yellowstone, we named this population the “Pooled Grey Wolves”. Details about coverage and  
139 accession numbers for the individuals in this study are summarized in Supplementary Table 1.

140

#### 141 **Estimating the effective sex ratio based on genetic diversity**

142 Previous work has shown that dogs experience male mutation bias, where the mutation rate is higher in  
143 males compared to females due to more germline cell divisions in males at reproduction<sup>28-30</sup>. Male  
144 mutation bias has a significant impact on measurements of genetic diversity because it can inflate raw  
145 metrics of genetic diversity on the autosomes compared to on the X chromosome (reviewed in Webster  
146 and Wilson Sayres 2016<sup>21</sup>). To confirm that male mutation bias exists in our data, we computed male  
147 mutation bias for each population using dog-cat divergence (see Methods). We observed that the level of  
148 male mutation bias is around 2, which is consistent with previous reports<sup>29,30</sup> (Supplementary Table 2).  
149 Therefore, we controlled for male mutation bias in all estimates of genetic variation by normalizing  
150 autosomal and X chromosome diversity by dog-cat divergence in the corresponding regions.

151

152 Natural selection is thought to be more efficient at reducing genetic diversity on the X chromosome than  
153 on the autosomes because males have only one X chromosome which is exposed directly to selection  
154 (reviewed in Webster and Wilson Sayres 2016<sup>21</sup>). To control for natural selection affecting the X  
155 chromosome more than the autosomes, we used regions of the genome in which mutations would be

156 putatively neutral by removing sites that are functional. Specifically, we removed genic and conserved  
157 sites (see Methods).

158

159 To understand whether any evolutionary process has been sex-biased over ancient timescales, we  
160 computed  $Q_\pi$ . We found that in both dog and wolf populations,  $Q_\pi$  is significantly less than 0.75 (Figure  
161 1, No cM cutoff), suggesting a male-biased sex ratio, with more males reproducing relative to females.

162

163  $Q_\pi$  of less than 0.75 could occur due to the effect of natural selection on linked neutral sites. Specifically,  
164 natural selection could have reduced diversity in linked neutral regions on the X chromosome more than  
165 on the autosomes, as seen in humans<sup>23–25</sup>. Further, it is possible that there is more constraint on noncoding  
166 regions near genes on the X chromosome than on the autosomes<sup>31</sup>. To measure how neutral diversity is  
167 affected by linked selection, we compared diversity on the X chromosome and autosomes in regions near  
168 genes versus putatively unconstrained regions 0.4 cM away from the nearest gene. Diversity increased  
169 more with increasing distance from genes on the X chromosome than on the autosomes, consistent with  
170 natural selection reducing diversity more on the X chromosome than on the autosomes near genes  
171 (Supplementary Table 3).

172

173 To test whether stronger linked selection acting on the X chromosome relative to the autosomes could  
174 cause  $Q_\pi$  to be less than 0.75, we expanded our filtering criteria to remove sites that are near genes,  
175 defined by genetic distance (see Methods). Since we did not know *a priori* what the minimum genetic  
176 distance would be required to obtain sites that are not affected by selection, we included several  
177 thresholds. We removed sites whose genetic distance to the nearest genes is less than 0.2 cM, 0.4 cM, 0.6  
178 cM, 0.8 cM, and 1 cM. We observed that even after removing sites whose genetic distance to the nearest  
179 genes are less than 1 cM,  $Q_\pi$  is still less than the expected 0.75 in both dog and wolf populations, except  
180 for the German Shepherd (Figure 1). In the German Shepherd, when using the thresholds of 0.8 cM and 1

181 cM,  $Q_\pi$  approaches 0.75. However, since there are significantly fewer sites and variants left after  
182 removing sites whose genetic distance to the nearest genes is less than 0.8 cM or 1 cM, we could not  
183 exclude the possibility that we are underpowered to detect any signal in the data (Supplementary Table 4).  
184 Nonetheless, these results suggest that while linked selection may partially account for  $Q_\pi$  of less than  
185 0.75, especially in the German Shepherd, linked selection by itself cannot explain why  $Q_\pi$  is less than  
186 0.75 across all dog and wolf populations. In sum, our results suggest that there has been male-biased sex  
187 ratios in both dogs and wolves over ancient evolutionary timescales.

188

### 189 **Inference of sex-biased demographic processes under population genetic models**

190 Pool and Nielsen (2007) demonstrated that a  $Q_\pi$  of less than 0.75 could be explained by a reduction in  
191 population size even with an equal number of breeding males and females<sup>32</sup>. To test whether population  
192 bottlenecks can explain the reduction in diversity on the X chromosome, we fitted a demographic model  
193 that includes a bottleneck using the autosomal site frequency spectrum (SFS) (Supplementary Figure 1)  
194 and asked whether the best fitting demographic model on the autosomes could also account for the level  
195 of diversity on the X chromosome when using an  $N_X/N_A$  ratio of 0.75. If a demographic model including  
196 a bottleneck by itself can generate a  $Q_\pi$  of less than 0.75, we would expect that scaling the population size  
197 of the X chromosome to be three-quarters that of the autosomes should result in a  $Q_\pi$  comparable to the  
198 empirical data. Additionally, we then employed a composite likelihood framework to directly infer the  
199  $N_X/N_A$  ratio from the SFS while accounting for the complex non-equilibrium demography.

200

201 First, we fitted a demographic model that includes a bottleneck using the SFS on the autosomes using  
202 *fastsimcoal2*<sup>33</sup> for each population considering regions of greater than 0.4 cM, 0.6 cM, 0.8 cM, and 1 cM  
203 from genes. We reasoned that we would not be able to exclude the role of selection when not removing  
204 sites near genes or using too small of a threshold (i.e. 0.2 cM). We also corrected for male mutation bias  
205 using mutation rates that we inferred from dog-cat divergence in the same windows (see Methods;



206 Supplementary Table 2). The inferred demographic parameters that resulted in the best likelihood of the  
207 data are presented in Supplementary Table 5. To test whether the inferred demographic parameters can  
208 recapitulate the autosomal data, we used *fastscoal2* to generate the expected SFSs. In all populations  
209 except the German Shepherds, across all thresholds examined, we observed that the SFSs generated using  
210 the inferred demographic parameters visually match with the empirical autosomal SFSs (Supplementary  
211 Figure 2). The differences in log-likelihood between the simulated SFSs and the empirical SFSs are also  
212 small (Supplementary Table 6), confirming our visual inspection of the fit of the demographic models. In  
213 addition, autosomal genetic diversity ( $\pi$ ) computed from the demographic model is comparable to the  
214 empirical estimates of  $\pi$  (Supplementary Figure 3). Thus, these lines of evidence demonstrate that the  
215 inferred demographic parameters can recapitulate the empirical data on the autosomes, except for the  
216 more stringent filtering on the German Shepherd (See Supplementary Note 1).

217  
218 To understand whether the demographic model including a bottleneck that was fitted to the autosomal  
219 data could account for the level of diversity on the X chromosome, we used the inferred demographic  
220 parameters to simulate the SFSs for the X chromosome. To account for the differences in population size  
221 between the X chromosome and the autosomes, we adjusted the population size on the X chromosome by  
222 a constant value which we called  $C$ , where  $N_X = CN_A$ . If a bottleneck by itself without any sex biased  
223 demography can generate a  $Q_\pi$  of less than 0.75, we expected that using a  $C$  value of 0.75 would  
224 recapitulate the empirical data. If a bottleneck model by itself is not sufficient to generate a  $Q_\pi$  of less  
225 than 0.75, and sex-biased processes need to be invoked, we expected that rescaling the population size on  
226 the X chromosome to be three-quarters of the population size on the autosomes would not fit well. Rather,  
227 a different value of  $C$  would yield a better fit.

228  
229 To assess whether a null  $C$  value of 0.75 or a different  $C$  value yielded a better fit to the empirical SFSs  
230 on the X chromosome, we searched over a grid of  $C$  values. We found the maximum likelihood value of

231  $C$  for each population and filtering threshold. To do this, for each  $C$  on a grid of  $C$  values, we first  
232 calculated the population size on the X chromosome, which is  $N_X = CN_A$ . We then used *fastsimcoal2* to  
233 simulate an SFS and assess the fit by comparing the Poisson log-likelihood to the SFS on the X  
234 chromosome (see Methods). For each population and for each threshold, we found a set of  $C$  values that  
235 maximizes the likelihood of the data (Figure 2, Table 1, Supplementary Table 7).  
236  
237 With the exception of the German Shepherd at the most stringent filtering thresholds ( $>0.8$  cM and  $>1$   
238 cM), we inferred that  $C$  is less than 0.75 for all population and filtering thresholds. When using a filtering  
239 threshold of 0.4 cM from genes, we found that  $C$  ranges from 0.61 to 0.68. The full model, where we  
240 inferred  $C$  for each comparison, fits the observed X chromosome SFS significantly better than a model  
241 where  $C$  is constrained to be 0.75 (Likelihood Ratio Tests  $> 30$ , p-value  $< 10^{-8}$ ; Table 1). Further, the null  
242  $C$  value of 0.75 does not visually fit the SFSs on the X chromosome (Supplementary Figure 4, blue bars),  
243 suggesting that we can reject an equal number of reproducing males and females. Third, we observed that  
244 diversity on the X chromosome from simulating with a null  $C$  value of 0.75 overestimated the empirical X  
245 chromosome diversity (Supplementary Figure 5, blue bars). These results suggest that a model including  
246 both a bottleneck and a male-bias sex ratio can generate  $Q_\pi$  of less than 0.75 and recapitulate the observed  
247 SFSs and genetic diversity. Only in the German Shepherd population when using the most stringent  
248 threshold ( $>0.8$  cM and  $>1$  cM), can a demographic history including a bottleneck by itself generate a  
249  $Q_\pi$  of less than 0.75.

250

### 251 **Female-biased sex ratio within dogs in recent history**

252 Since estimates of sex ratios from levels of genetic diversity are sensitive to ancient sex-biased processes  
253 (prior to or immediately after the split between two species), we wanted to determine whether the pattern  
254 of male-biased contributions remained constant throughout the evolutionary history of canines<sup>20</sup>. To study  
255 sex-biased demography on recent timescales, we computed  $Q_{FST}$  for each pair of populations (see

256 Methods). In the dog to dog comparison, we computed  $Q_{FST}$  between German Shepherds and Tibetan  
257 Mastiffs, between German Shepherds and Pooled Breed Dogs, and between Tibetan Mastiffs and Pooled  
258 Breed Dogs. We observed that  $Q_{FST}$  is greater than 0.75 for all three pairs and across all thresholds,  
259 suggesting a female-biased sex ratio within the dog populations in recent history (Figure 3 and  
260 Supplementary Figure 6). This is consistent with fewer reproducing males than females in the population  
261 since the formation of different dog breeds. In the wolf to wolf comparison, we computed  $Q_{FST}$  between  
262 Arctic Wolves and Pooled Grey Wolves. In contrast to the breed dogs, we found that  $Q_{FST}$  is less than  
263 0.75 when using the thresholds of  $>0.4$  cM and  $>0.6$  cM, suggesting that a male-biased sex ratio has been  
264 maintained within the wolf populations in recent history (Figure 3 and Supplementary Figure 6).  
265 However, we noted that when using a more stringent threshold ( $>0.8$  cM or  $>1$  cM),  $Q_{FST}$  within wolves  
266 approaches 0.75 or greater than 0.75 (Supplementary Figure 6). We could not exclude the possibility that  
267 we are unable to detect a true signal in the data due to significantly fewer sites and variants left after the  
268 more stringent filtering (Supplementary Table 4). Overall, these results indicate that while the process  
269 within wolves has probably maintained a male-bias from ancient to recent history, the process within dogs  
270 has changed to female-bias, potentially because of breeding practices that have led to female-biased  
271 processes such as the popular sire effect.

272

## 273 **DISCUSSION**

274 In this study, we used two different statistics to estimate the ratio of reproducing males to females in  
275 canines and found that the demographic history of dogs and wolves has been sex-biased, but not always in  
276 the same direction. Estimating the sex ratio based on the levels of genetic diversity ( $Q_{\pi}$ ) from the X  
277 chromosome and autosomes showed a male-biased sex ratio in both dogs and wolves on an ancient  
278 timescale, which cannot be explained by linked selection or a population size reduction on its own (Figure  
279 1 and Figure 2). Instead, in both dogs and wolves, there has been a larger number of reproducing males  
280 than females. In wolf packs, the alpha male and female are the dominant reproducers, but subdominant

281 reproduction is common and may involve multiple fathers for a single litter<sup>14</sup>. Multiple paternity is a  
282 unique aspect of canid reproduction and may help drive a male bias in reproduction, as offspring of a  
283 single litter can only have a one mother, but may have multiple fathers and litter size may be as large as  
284 16 individuals<sup>34</sup>. In addition, wolves migrating to existing wolf packs are predominantly male-biased<sup>14</sup>.  
285 Further, “Casanova wolves” who stay near a wolf pack during mating season to mate with the non-alpha  
286 females could also cause male-biased mating patterns<sup>15</sup>. Multiple paternity and male-biased migration  
287 likely occurred in early dogs, but under more recent controlled breeding, valuable sires would be the only  
288 father of a litter. Hence the controlled nature of breeding in modern dog breeds, and the focus on a subset  
289 of “popular” sires could drive the female bias in reproduction. The population sire effect also reduces the  
290 effective size of breeds and effects such as inbreeding further skew evolution in modern breeds.

291  
292 In addition, we observed that determining the amount of bias based on the absolute value of  $Q_\pi$  by itself  
293 can lead to overestimation, because the reduction of diversity on the X chromosome due to a population  
294 size reduction is not accounted for. For example, in Tibetan Mastiff, when using a threshold of 0.6 cM to  
295 remove linked neutral sites, a  $Q_\pi$  of 0.52 suggests an  $N_X/N_A$  ratio of 0.52. However, we inferred a  $C$   
296 value of 0.57 (confidence interval: 0.56-0.6) using our modelling framework, indicating that the sex ratio  
297 is higher than when just examining the absolute value of  $Q_\pi$ . This difference exists because the estimate  
298 of  $Q_\pi$  could be affected by a population size reduction differentially influencing diversity on the X and  
299 autosomes<sup>32</sup>, but our inference framework accounts for this effect. Our findings suggest that inferring the  
300 sex ratio in a model-based framework should yield a more accurate estimate than the absolute  $Q_\pi$ <sup>22</sup>.

301  
302 Our results add to the growing literature on the complex demographic history of dogs (reviewed in  
303 Freedman et al. 2016<sup>3</sup> and Ostrander et al. 2017<sup>4</sup>). In addition to multiple episodes of bottleneck and  
304 admixture events, we now present evidence for sex-biased demographic processes. Furthermore, we  
305 provide evidence that sex-biased processes within dogs have changed throughout evolution, switching  
306 from a male-bias in ancient timescales to a female-bias in recent timescales, reflecting how modern

307 breeding practices influence the sex ratio. To the best of our knowledge, this is the first genomic study of  
308 sex-biased demography in dogs. Some limitations in this study provide avenues for future work. First, our  
309 study was limited by the availability of high coverage (>15X coverage) whole-genome sequences of  
310 female individuals at the time of analysis. Future studies could utilize more female individuals and a  
311 variety of populations to understand whether there are differences in sex-biased processes between  
312 breeds. Second, future work could extend our modelling framework by including more complex  
313 demographic scenarios such as migration events to better capture the autosomal data, especially the  
314 German Shepherds. Finally, future studies could examine whether processes such as admixture with  
315 wolves or introgression has been sex-biased.

316

## 317 **METHODS**

### 318 **Whole-genome sequence processing**

319 We followed Genome Analysis Toolkit's (GATK) documentation for variant discovery best practices<sup>35-37</sup>.  
320 Scripts used for processing whole-genome sequencing for each of the following steps can be found at  
321 [https://github.com/tnphung/NGS\\_pipeline](https://github.com/tnphung/NGS_pipeline).

322

#### 323 *Data pre-processing for variant calling*

324 First, we converted all fastq files to raw unmapped reads using Picard FastqToSam<sup>38</sup>. Second, we marked  
325 Illumina adapters using Picard MarkIlluminaAdapters<sup>38</sup>. Third, we mapped to the reference dog genome  
326 (canFam3) using bwa-mem<sup>39</sup>. Fourth, we marked duplicates using Picard MarkDuplicates<sup>38</sup>. We then  
327 recalibrated base quality scores using GATK where we performed three rounds of recalibration to obtain  
328 analysis-ready reads in BAM file format.

329

#### 330 *Variant calling with GATK*

331 We used GATK Haplotype caller for variant calling<sup>35-37</sup>. We first generated a gVCF file for each  
332 individual. We then performed joint-genotyping for all 33 individuals in our study.

333

334 *Filtering to obtain high quality sites*

335 To obtain sites that are high confidence, we retained sites whose depth (annotated as DP in VCF file  
336 format) is between 50% and 150% of the mean depth across all sites. In addition, we only kept sites that  
337 were genotyped in all 33 individuals (i.e. the total number of alleles in called genotypes, AN, is equal to  
338 66).

339

340 *Variant filtering*

341 We obtained variant sites from the VCF files by using GATK SelectVariants<sup>35-37</sup>. We then filtered these  
342 variants by applying GATK Hard Filter (QD < 2.0, FS > 60.0, MQ < 40.0, MQRankSum < -12.5,  
343 ReadPosRankSum < -8.0). In addition, we only selected biallelic SNPs and removed any clustered SNPs  
344 defined by having 3 SNPs within 10bp.

345

346 **Filtering nucleotide sites**

347 *Filtering out the pseudoautosomal regions (PARs) of the X chromosome*

348 Previous work showed that the PARs in canines span the first 6.59Mb of the X chromosome<sup>40</sup>. Therefore,  
349 we filtered out the PARs by removing any site that overlaps with the first 6.59Mb of the X chromosome.  
350 In humans, it was shown that genetic diversity does not drop abruptly at the PAR boundary<sup>41</sup>. Rather,  
351 genetic diversity decreases gradually over the PAR boundary and reaches nonPAR diversity past the PAR  
352 boundary<sup>41</sup>. One concern is that filtering out the PARs is not sufficient to avoid any inflation of X-linked  
353 variation. However, if this is the case, we would expect  $Q_\pi$  we calculated to be higher than the actual  $Q_\pi$ .  
354 Therefore,  $Q_\pi$  less than 0.75 is not caused by not sufficiently filtering sites on the nonPARs.

355

356 *Filtering sites that could be under the direct effect of selection*

357 To control for the effects of direct selection, we removed sites that are potentially functional and therefore  
358 are more likely to be affected by purifying or positive selection. Specifically, we removed sites that

359 overlap with a gene transcript as defined by Ensembl (gene transcripts include both exons and introns).

360 We also removed sites that are conserved across species. To obtain conserved sites, we downloaded  
361 phastConsElements100way for hg19 from the UCSC Genome Browser and used liftOver command line  
362 tool to convert hg19 coordinates to canFam3 coordinates.

363

#### 364 *Filtering out sites that could be affected by linked selection*

365 To control for the effect of natural selection on linked neutral sites, we employed a filtering criterion to  
366 remove sites near genes as defined by genetic distance to the nearest genes. We used the genetic distance  
367 map based on patterns of linkage disequilibrium from Auton et al. (2013) because this genetic map  
368 includes information for the X chromosome whereas the pedigree map from Campbell et al. (2016) does  
369 not have information on the X chromosome<sup>42,43</sup>. For each site that is outside of genes and conserved  
370 regions, we found its nearest gene in terms of physical distance. We then converted physical distance to  
371 genetic distance using the genetic map from Auton et al. (2013)<sup>42</sup>. Since we did not know *a priori* what  
372 the minimum genetic distance is required to remove sites near genes to control for linked selection, we  
373 used multiple thresholds. Specifically, we removed sites whose genetic distance to the nearest gene is less  
374 than 0.2 cM, less than 0.4 cM, less than 0.6 cM, less than 0.8 cM, and less than 1 cM.

375

#### 376 *Identifying sites that are alignable between dog and cat*

377 Since we controlled for mutation rate variation by normalizing the uncorrected genetic diversity by dog-  
378 cat divergence, we identified regions of the genome that are alignable between dog and cat. We  
379 downloaded the pairwise alignment between dog and cat from the UCSC Genome browser<sup>44</sup>. We then  
380 generated BED files whose coordinates represent regions of the genome that are alignable between dog  
381 and cat.

382

383 In summary, for our empirical analyses, we used regions of the genome that are (1) not affected directly  
384 by selection, (2) not affected by linked selection using multiple thresholds, (3) high in quality (see the  
385 section on filtering to obtain high quality sites above), and (4) alignable between dog and cat.

386

### 387 **Computing $Q_\pi$**

388 *Computing uncorrected average pairwise differences between sequences ( $\pi$ )*

389 We computed genetic diversity,  $\pi$ , defined as the average number of differences between pairs of  
390 sequences<sup>45</sup>:

391  $\pi = \frac{n}{n-1} \sum_i^{\text{all sites}} p_i(1 - p_i)$  where  $p_i$  is the allele frequency and  $n$  is the number of alleles. For each

392 region of the genome that satisfies the filtering criteria above, we computed  $\pi$  for the X chromosome and

393 autosomes. To obtain the mean in diversity,  $\pi/\text{site}$ , we calculated:  $\pi/\text{site} = \frac{\sum_i^{\text{regions}} \pi}{\sum_i^{\text{regions}} \text{total sites}}$ .

394

395 *Computing dog-cat divergence*

396 For each region of the genome that satisfies the filtering criteria above, we tabulated the number of DNA

397 differences between dog and cat. To obtain the mean in divergence, we calculated  $\frac{\text{divergence}}{\text{site}} =$

398  $\frac{\sum_i^{\text{regions}} \text{number of divergent sites}}{\sum_i^{\text{regions}} \text{total sites}}$ .

399

400 *Computing male mutation bias*

401 We computed male mutation bias ( $\alpha$ ) using divergence on the X chromosome and on the autosomes as

402 follows<sup>46</sup>:  $\alpha = \frac{4-3\frac{X}{A}}{3\frac{X}{A}-2}$ .

403

404 *Computing corrected diversity*



405 To control for variation in mutation rates across chromosomes, we normalized diversity by dog-cat  
406 divergence by dividing  $\pi$ /site by divergence/site.

407

#### 408 *Constructing 95% confidence interval by bootstrapping*

409 We generated bootstrap replicates of the BED file that we used to compute genetic diversity and  
410 divergence by randomly selecting a fragment from the BED file with replacement. For each bootstrap  
411 replicate, the number of fragments chosen was equal to the number of fragments in the original BED file.  
412 We generated 1000 bootstrap replicates. For each of the 1000 bootstraps on the X chromosome, we  
413 computed uncorrected  $\pi$ , dog-cat divergence, and corrected  $\pi$ . We did the same calculations for each of  
414 the 1000 bootstraps on the autosomes. We then divided corrected  $\pi$  on the X chromosome by corrected  $\pi$   
415 on the autosomes to obtain  $Q_\pi$ . We calculated 95% confidence interval using 1000 bootstrapped values of  
416 corrected  $\pi_X$ , 1000 bootstrapped values of corrected  $\pi_A$ , and 1000 bootstrapped values of corrected  $Q_\pi$  by  
417 selecting the values at the 2.5 and 97.5 percentiles.

418

#### 419 **Computing $Q_{FST}$**

##### 420 *Computing $F_{ST}$*

421 We computed Weir and Cockerham's  $F_{ST}$  for each pair of populations using the *SNPRelate* package  
422 implemented in *R*<sup>47</sup>. For dog-to-dog comparison, we computed  $F_{ST}$  for German Shepherds and Tibetan  
423 Mastiffs, German Shepherds and Pooled Breed Dogs, and Tibetan Mastiff and Pooled Breed Dogs. For  
424 wolf-to-wolf comparison, we computed  $F_{ST}$  for Arctic Wolves and Grey Wolves. Since the number of  
425 individuals differs between populations, we subsampled such that there were four individuals in each  
426 population (Supplementary Table 8). We computed  $F_{ST}$  for the X chromosome and for the autosomes.

427

##### 428 *Computing $Q_{FST}$*

429 We computed  $Q_{FST}$  using:  $Q_{FST} = \frac{\ln(1-2F_{ST}^A)}{\ln(1-2F_{ST}^X)}$ <sup>20,23</sup>.

430

431 *Constructing 95% confidence interval by bootstrapping*

432 Since the input to *SNPRelate* to calculate  $F_{ST}$  is a VCF file format, we generated 1000 bootstrapped VCF  
433 files by randomly selecting variants from the VCF file with replacement. The number of variants selected  
434 for each bootstrapped VCF is equal to the number of variants in the empirical VCF file. For each  
435 bootstrapped VCF, we computed  $F_{ST}$  and  $Q_{FST}$  as explained above. From the 1000 values of bootstrapped  
436  $Q_{FST}$ , we then calculated 95% confidence interval by selecting the values at the 2.5 and 97.5 percentiles.

437

438 **Modeling framework to estimate the  $N_X/N_A$  ratio (C)**

439 *Obtaining the site frequency spectrum (SFS)*

440 We computed the folded SFSs using Equation 1.2 of Wakely's *An Introduction to Coalescent Theory*<sup>48</sup>,  
441 reproduced as follows:

442 
$$\eta_i = \frac{\xi_i + \xi_{n-i}}{1 + \delta_{i,n-i}} \quad 1 \leq i \leq [n/2]$$

443 where  $\xi_i$  is the number of sites where the alternate allele is present at  $i$  copies,  $\delta_{i,n-i}$  is equal to 0 when  
444  $i \neq n - i$  and is equal to 1 when  $i = n - i$ . For each population and for each threshold to remove linked  
445 neutral sites (>0.4 cM, >0.6 cM, >0.8 cM, and >1 cM), we computed the folded SFSs for the X  
446 chromosome and autosomes.

447

448 *Computing mutation rates*

449 We utilized dog-cat divergence to infer the mutation rates for the X chromosome and autosomes.

450 Specifically,  $\mu = \frac{D}{2t_{split}}$ , where  $D$  is the divergence/site between dog and cat (see Computing dog-cat

451 divergence section above) and  $t_{split}$  is the split time between dog and cat in unit of generation. We used

452 54 million years as the split time between dog and cat and a generation time of 3 years per generation<sup>49,50</sup>.

453 The estimates of mutation rates are in the same order of magnitude as estimate from ancient DNA  
454 (Supplementary Table 4)<sup>8</sup>.

455

#### 456 *Inferring demographic parameters*

457 We inferred demographic parameters from the autosomal data (SFSs on the autosomes) using a maximum  
458 likelihood framework as implemented in *fastsimcoal2*<sup>33</sup>. We specified a bottleneck demographic model  
459 and inferred four parameters:  $N_{ANC}$  which is the population size in the ancestral population,  $N_{BOT}$  which is  
460 the population size during the bottleneck,  $N_{CUR}$  which is the population size in the current day, and  $T_{BOT}$   
461 which is the duration between the end of the bottleneck and current day (Supplementary Figure 1).

462 Further, we repeated the inference of the previous four parameters for values  $BOT_{DUR}$  (the duration of the  
463 bottleneck) ranging from 75 to 100 generations (Supplementary Figure 1) and chose the value that yielded  
464 the highest likelihood. We implemented this procedure for each population and for thresholds of  $>0.4$  cM,  
465  $>0.6$  cM,  $>0.8$  cM, and  $>1$  cM to remove linked sites. The demographic parameters that maximized the  
466 likelihood are summarized in Supplementary Table 5.

467

#### 468 *Inferring $N_X/N_A$ ratio ( $C$ )*

469 To account for differences in population size between the X chromosome and autosomes, we scaled the  
470 population size on the X chromosome to that on the autosomes by a constant factor we called  $C$ , where  
471  $N_X = CN_A$ . To find the maximum likelihood estimate of  $C$ , we searched over a grid for values of  $C$ ,  
472 including 0.75, to find a value that resulted in the highest likelihood. Because the number of SNPs at  
473 particular frequencies contains substantial information about demography, we used a Poisson likelihood  
474 for the number of SNPs in each entry of the SFS to compute the Poisson log-likelihood as in Beichman et  
475 al. (2017)<sup>51</sup>.

476

#### 477 *Assessing fit of MLEs of $C$ to $\pi$*

478 We computed diversity from the simulated SFSs under the demographic models fit to the autosomes  
479 using the MLEs of  $C$  (Table 1) and compared that to the empirical uncorrected diversity.

480

#### 481 **Data availability**

482 All scripts can be found at <https://github.com/tnphung/SexBiased>. SRA numbers for *fastq* files are listed  
483 in Supplementary Table 1. Post base quality score calibration (BQSR) BAM files and VCF files are  
484 available upon request.

485

#### 486 **ACKNOWLEDGEMENTS**

487 We thank Jacqueline Robinson for providing the sequencing data for the Arctic Wolves and Christian  
488 Huber for helpful discussions. This work was supported by the National Institute of General Medical  
489 Sciences (NIGMS) of the National Institutes of Health (NIH) grant R35GM119856 to K.E.L and NIGMS  
490 grant R35GM124827 to M.A.W.S. T.N.P. was supported by NIH-NCI National Cancer Institute  
491 T32CA201160.

492

493 **FIGURES**

494 **Figure 1. X-linked and autosomal genetic diversity across canids.** Genetic diversity measured as the  
495 average pairwise differences between sequences ( $\pi$ ) corrected for mutation rate variation using divergence  
496 (see Methods) on the X chromosome and autosomes in multiple canid populations.  $Q$  denotes the ratio of  
497  $\pi$  on the X chromosome to that of the autosomes. The horizontal red line denotes the null expectation of  
498 0.75. Bins along the x-axis denote different filtering based on genetic distances from genes. Error bars  
499 denote 95% confidence intervals obtained through bootstrapping (see Methods).

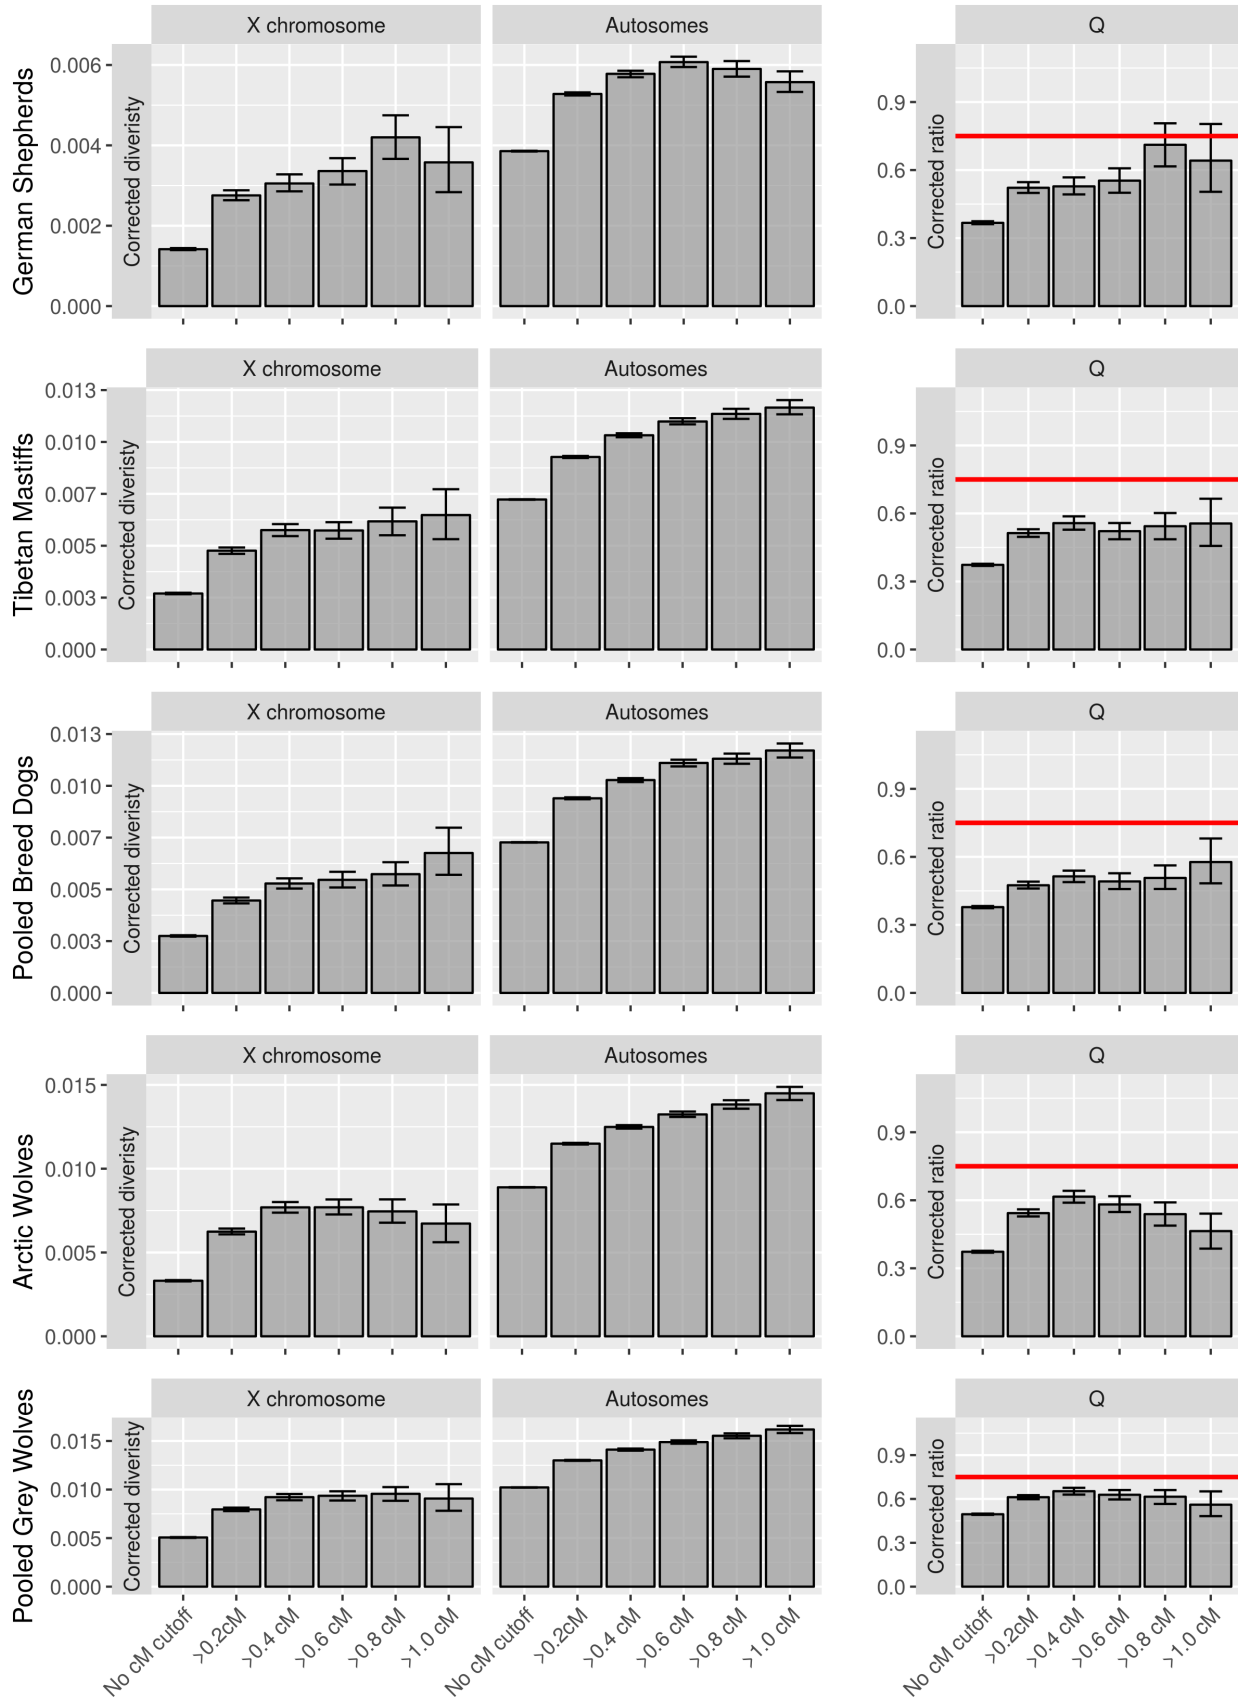

501 **Figure 2. Effective population size estimates for multiple canid populations.** Maximum likelihood  
502 estimates (MLEs) of the effective population size on the X chromosome relative to that of the autosomes  
503 ( $C = N_X/N_A$ ) are shown for German Shepherds, Tibetan Mastiffs, Pooled Breed Dogs, Arctic Wolves and  
504 Pooled Grey Wolves with increasing distance from genes. Error bars denote approximate asymptotic 95%  
505 confidence intervals obtained as the parameter values within 2 log-likelihood unites of the MLE.

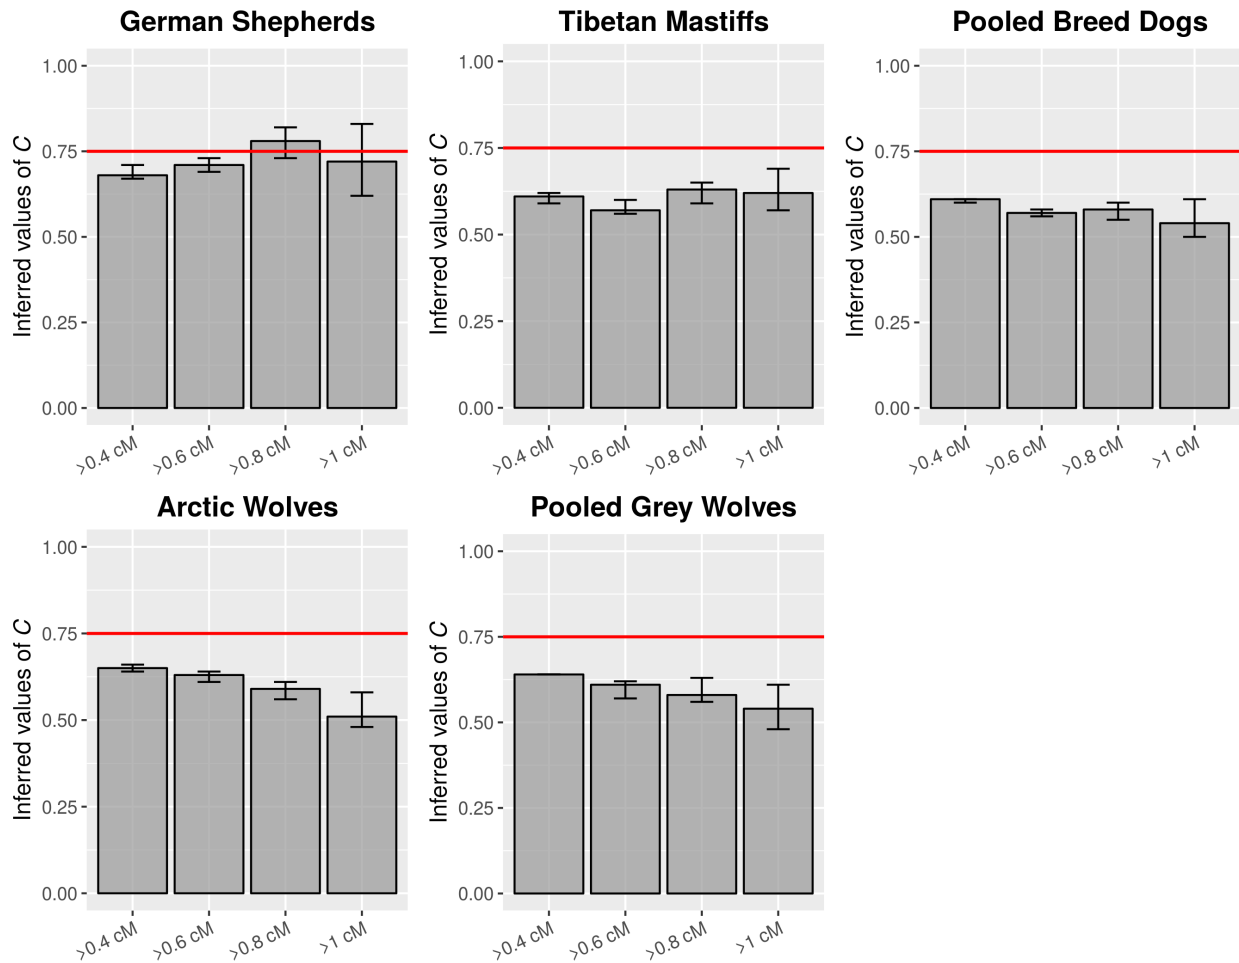

506

507

508 **Figure 3. Sex biased demography on recent time scales.** Estimates of the sex ratio for a pair of  
509 populations computed using  $F_{ST}$  (see Methods) using a threshold of  $>0.6$  cM to remove linked neutral  
510 sites are shown. The horizontal red line denotes the null expectation of 0.75. Error bars denote 95%  
511 confidence intervals obtained through bootstrapping (see Methods). Abbreviations: GS (German  
512 Shepherds), TM (Tibetan Mastiffs), BD (Pooled Breed Dogs), AW (Arctic Wolves), GW (Pooled Grey  
513 Wolf).

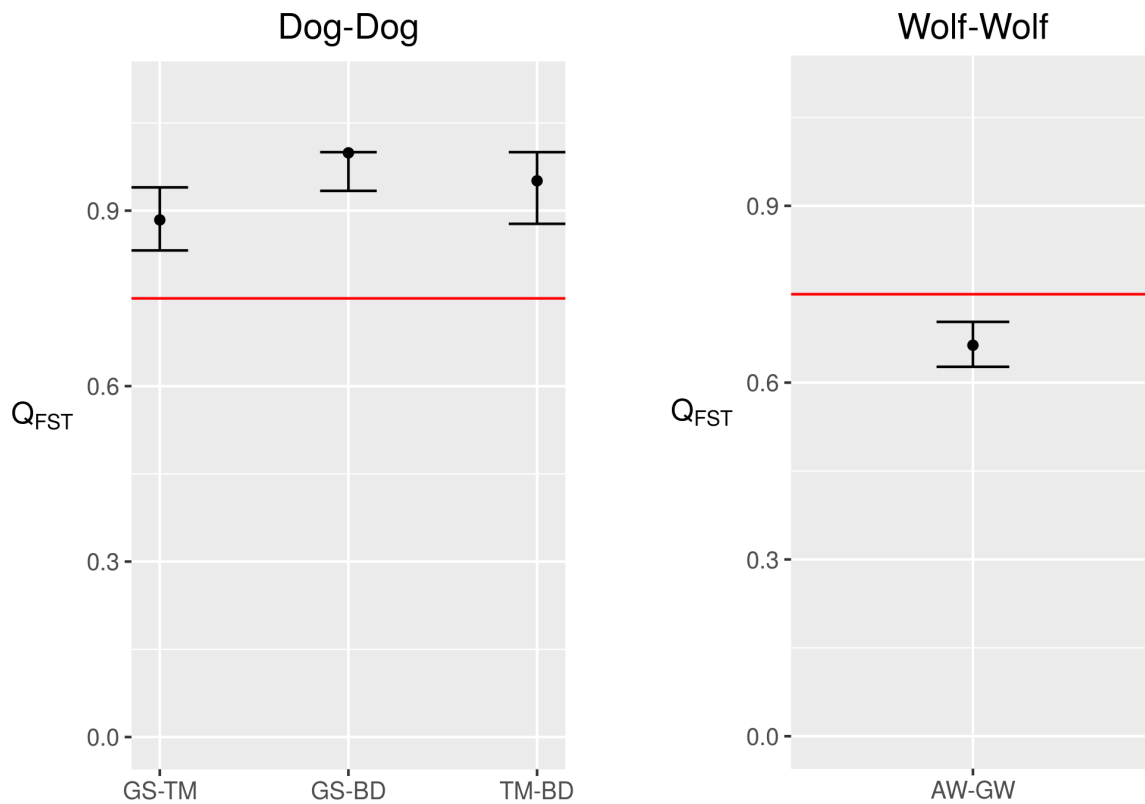

514

515



516 **TABLES**

517 **Table 1. Likelihood ratio tests comparing models of sex-biased demography in multiple canid**

518 **populations.** Likelihood ratio tests of the amount of sex-biased demography are shown when removing

519 any sites whose genetic distance to the nearest genes is less than 0.4 cM. For the other thresholds, see

520 Supplementary Table 7.

| Population         | <i>C</i>                | Log-likelihood | Likelihood ratio test | p-value                  |
|--------------------|-------------------------|----------------|-----------------------|--------------------------|
| German Shepherds   | Null ( <i>C</i> = 0.75) | 7460.957       | 34.779                | 3.69 X 10 <sup>-9</sup>  |
|                    | Best ( <i>C</i> = 0.68) | 7478.347       |                       |                          |
| Tibetan Mastiffs   | Null ( <i>C</i> = 0.75) | 16050.84       | 208.972               | 2.30 X 10 <sup>-47</sup> |
|                    | Best ( <i>C</i> = 0.61) | 16155.32       |                       |                          |
| Pooled Breed Dogs  | Null ( <i>C</i> = 0.75) | 16875.26       | 249.627               | 3.13 X 10 <sup>-56</sup> |
|                    | Best ( <i>C</i> = 0.61) | 17000.07       |                       |                          |
| Arctic Wolves      | Null ( <i>C</i> = 0.75) | 23035.46       | 133.341               | 7.62 X 10 <sup>-31</sup> |
|                    | Best ( <i>C</i> = 0.65) | 23102.13       |                       |                          |
| Pooled Grey Wolves | Null ( <i>C</i> = 0.75) | 30767.69       | 188.719               | 6.05 X 10 <sup>-43</sup> |
|                    | Best ( <i>C</i> = 0.64) | 30862.05       |                       |                          |

521

522

523 **REFERENCES**

- 524 1. Hemmer, H. *Domestication: The Decline of Environmental Appreciation*. (Cambridge University  
525 Press, 1990).
- 526 2. Freedman, A. H. *et al.* Genome sequencing highlights the dynamic early history of dogs. *PLoS*  
527 *Genet.* **10**, e1004016 (2014).
- 528 3. Freedman, A. H., Lohmueller, K. E. & Wayne, R. K. Evolutionary history, selective sweeps, and  
529 deleterious variation in the dog. *Annu. Rev. Ecol. Evol. Syst.* **47**, 73–96 (2016).
- 530 4. Ostrander, E. A., Wayne, R. K., Freedman, A. H. & Davis, B. W. Demographic history, selection  
531 and functional diversity of the canine genome. *Nat. Rev. Genet.* **18**, 705–720 (2017).
- 532 5. Freedman, A. H. & Wayne, R. K. Deciphering the origin of dogs: from fossils to genomes. *Annu.*  
533 *Rev. Anim. Biosci.* **5**, 281–307 (2017).
- 534 6. Boyko, A. R. The domestic dog: man’s best friend in the genomic era. *Genome Biol.* **12**, 216  
535 (2011).
- 536 7. vonHoldt, B. M. *et al.* A genome-wide perspective on the evolutionary history of enigmatic wolf-  
537 like canids. *Genome Res.* **21**, 1294–1305 (2011).
- 538 8. Larson, G. *et al.* Rethinking dog domestication by integrating genetics, archeology, and  
539 biogeography. *Proc. Natl. Acad. Sci.* **109**, 8878–8883 (2012).
- 540 9. Thalmann, O. *et al.* Complete mitochondrial genomes of ancient canids suggest a European origin  
541 of domestic dogs. *Science* **342**, 871–874 (2013).
- 542 10. Botigué, L. R. *et al.* Ancient European dog genomes reveal continuity since the Early Neolithic.  
543 *Nat. Commun.* **8**, 16082 (2017).
- 544 11. Frantz, L. A. F. *et al.* Genomic and archaeological evidence suggest a dual origin of domestic  
545 dogs. *Science* **352**, 1228–1231 (2016).
- 546 12. Drake, A. G., Coquerelle, M. & Colombeau, G. 3D morphometric analysis of fossil canid skulls  
547 contradicts the suggested domestication of dogs during the late Paleolithic. *Sci. Rep.* **5**, 8299 (2015).
- 548 13. Wilson Sayres, M.A. Genetic diversity on the sex chromosomes. *Genome Biol. Evol.* **10**, 1064–  
549 1078 (2018).
- 550 14. Vonholdt, B. M. *et al.* The genealogy and genetic viability of reintroduced Yellowstone grey  
551 wolves. *Mol. Ecol.* **17**, 252–274 (2008).
- 552 15. Casanova wolves | Natural History. Available at: <https://retrieverman.net/2010/12/17/casanova-wolves/>. (Accessed: 26th June 2018)
- 554 16. Baker, P. J., Funk, S. M., Bruford, M. W. & Harris, S. Polygynandry in a red fox population:  
555 implications for the evolution of group living in canids? *Behav. Ecol.* **15**, 766–778 (2004).

- 556 17. Sillero-Zubiri, C., Gottelli, D. & Macdonald, D. W. Male philopatry, extra-pack copulations and  
557 inbreeding avoidance in Ethiopian wolves (*Canis simensis*). *Behav. Ecol. Sociobiol.* **38**, 331–340 (1996).
- 558 18. Sundqvist, A.-K. *et al.* Unequal contribution of sexes in the origin of dog breeds. *Genetics* **172**,  
559 1121–1128 (2006).
- 560 19. Ostrander, E. A. & Kruglyak, L. Unleashing the canine genome. *Genome Res.* **10**, 1271–1274  
561 (2000).
- 562 20. Emery, L. S., Felsenstein, J. & Akey, J. M. Estimators of the human effective sex ratio detect sex  
563 biases on different timescales. *Am. J. Hum. Genet.* **87**, 848–856 (2010).
- 564 21. Webster, T. H. & Wilson Sayres, M. A. Genomic signatures of sex-biased demography: progress  
565 and prospects. *Curr. Opin. Genet. Dev.* **41**, 62–71 (2016).
- 566 22. Hammer, M. F., Mendez, F. L., Cox, M. P., Woerner, A. E. & Wall, J. D. Sex-biased  
567 evolutionary forces shape genomic patterns of human diversity. *PLoS Genet.* **4**, e1000202 (2008).
- 568 23. Keinan, A., Mullikin, J. C., Patterson, N. & Reich, D. Accelerated genetic drift on chromosome X  
569 during the human dispersal out of Africa. *Nat. Genet.* **41**, 66–70 (2009).
- 570 24. Hammer, M. F. *et al.* The ratio of human X chromosome to autosome diversity is positively  
571 correlated with genetic distance from genes. *Nat. Genet.* **42**, 830–831 (2010).
- 572 25. Arbiza, L., Gottipati, S., Siepel, A. & Keinan, A. Contrasting X-linked and autosomal diversity  
573 across 14 human populations. *Am. J. Hum. Genet.* **94**, 827–844 (2014).
- 574 26. Gou, X. *et al.* Whole-genome sequencing of six dog breeds from continuous altitudes reveals  
575 adaptation to high-altitude hypoxia. *Genome Res.* **24**, 1308–1315 (2014).
- 576 27. Marsden, C. D. *et al.* Bottlenecks and selective sweeps during domestication have increased  
577 deleterious genetic variation in dogs. *Proc. Natl. Acad. Sci.* **113**, 152–157 (2016).
- 578 28. Li, W. H., Yi, S. & Makova, K. Male-driven evolution. *Curr Opin Genet Dev* **12**, (2002).
- 579 29. Wilson Sayres, M. A. & Makova, K. D. Genome analyses substantiate male mutation bias in  
580 many species. *BioEssays News Rev. Mol. Cell. Dev. Biol.* **33**, 938–945 (2011).
- 581 30. Lindblad-Toh, K. *et al.* Genome sequence, comparative analysis and haplotype structure of the  
582 domestic dog. *Nature* **438**, 803–819 (2005).
- 583 31. Narang, P., Wilson Sayres, M. A. Variable autosomal and X divergence near and far from genes  
584 affects estimates of male mutation bias in great apes. *Genome Biol. Evol.* **8**, 3393–3405 (2016).
- 585 32. Pool, J. E. & Nielsen, R. Population size changes reshape genomic patterns of diversity.  
586 *Evolution* **61**, 3001–3006 (2007).
- 587 33. Excoffier, L., Dupanloup, I., Huerta-Sánchez, E., Sousa, V. C. & Foll, M. Robust demographic  
588 inference from genomic and SNP data. *PLoS Genet* **9**, e1003905 (2013).

- 589 34. Stahler, D. R., MacNulty, D. R., Wayne, R. K., vonHoldt, B. & Smith, D. W. The adaptive value  
590 of morphological, behavioural and life-history traits in reproductive female wolves. *J. Anim. Ecol.* **82**,  
591 222–234
- 592 35. McKenna, A. *et al.* The Genome Analysis Toolkit: A MapReduce framework for analyzing next-  
593 generation DNA sequencing data. *Genome Res.* **20**, 1297–1303 (2010).
- 594 36. DePristo, M. A. *et al.* A framework for variation discovery and genotyping using next-generation  
595 DNA sequencing data. *Nat. Genet.* **43**, 491–498 (2011).
- 596 37. Van der Auwera, G. A. *et al.* From FastQ data to high confidence variant calls: the Genome  
597 Analysis Toolkit best practices pipeline. *Curr. Protoc. Bioinforma.* **43**, 11.10.1-33 (2013).
- 598 38. Picard Tools - By Broad Institute. Available at: <http://broadinstitute.github.io/picard/>. (Accessed:  
599 9th March 2018)
- 600 39. Li, H. Aligning sequence reads, clone sequences and assembly contigs with BWA-MEM.  
601 *ArXiv13033997 Q-Bio* (2013).
- 602 40. Young, A. C., Kirkness, E. F. & Breen, M. Tackling the characterization of canine chromosomal  
603 breakpoints with an integrated in-situ/in-silico approach: The canine PAR and PAB. *Chromosome Res.*  
604 **16**, 1193–1202 (2008).
- 605 41. Cotter, D. J., Brotman, S. M. & Wilson Sayres, M. A. Genetic diversity on the human X  
606 chromosome does not support a strict pseudoautosomal boundary. *Genetics* **203**, 485-492 (2016).
- 607 42. Auton, A. *et al.* Genetic recombination is targeted towards gene promoter regions in dogs. *PLoS*  
608 *Genet* **9**, e1003984 (2013).
- 609 43. Campbell, C. L., Bhérer, C., Morrow, B. E., Boyko, A. R. & Auton, A. A pedigree-based map of  
610 recombination in the domestic dog genome. *G3 GenesGenomesGenetics* **6**, 3517–3524 (2016).
- 611 44. Kent, W. J. *et al.* The Human Genome Browser at UCSC. *Genome Res.* **12**, 996–1006 (2002).
- 612 45. Tajima, F. Evolutionary relationship of DNA sequences in finite populations. *Genetics* **105**, 437–  
613 460 (1983).
- 614 46. Link, V., Aguilar-Gómez, D., Ramírez-Suástegui, C., Hurst, L. D. & Cortez, D. Male mutation  
615 bias is the main force shaping chromosomal substitution rates in monotreme mammals. *Genome Biol.*  
616 *Evol.* **9**, 2198–2210 (2017).
- 617 47. Zheng, X. *et al.* A high-performance computing toolset for relatedness and principal component  
618 analysis of SNP data. *Bioinforma. Oxf. Engl.* **28**, 3326–3328 (2012).
- 619 48. Wakely, J. *Coalescent Theory: An Introduction*. (Macmillan Learning, 2016).
- 620 49. Hedges, S. B., Marin, J., Suleski, M., Paymer, M. & Kumar, S. Tree of life reveals clock-like  
621 speciation and diversification. *Mol. Biol. Evol.* **32**, 835–845 (2015).

622 50. Hedges, S. B., Dudley, J. & Kumar, S. TimeTree: a public knowledge-base of divergence times  
623 among organisms. *Bioinforma. Oxf. Engl.* **22**, 2971–2972 (2006).

624 51. Beichman, A. C., Phung, T. N. & Lohmueller, K. E. Comparison of single genome and allele  
625 frequency data reveals discordant demographic histories. *G3 Genes Genomes Genet.* **7**, 3605–3620  
626 (2017).

627
